# Supplementary material
Source: PubMed Central journal article supplement (PMC6791539)
Supplement: ehp-127-057011-s001.pdf [file ehp-127-057011-s001.pdf]

**Note to readers with disabilities:** *EHP* strives to ensure that all journal content is accessible to all readers. However, some figures and Supplemental Material published in *EHP* articles may not conform to [508 standards](#) due to the complexity of the information being presented. If you need assistance accessing journal content, please contact [ehp508@niehs.nih.gov](mailto:ehp508@niehs.nih.gov). Our staff will work with you to assess and meet your accessibility needs within 3 working days.

### **Supplemental Material**

#### **Association of Arsenic Exposure with Whole Blood DNA Methylation: An Epigenome-Wide Study of Bangladeshi Adults**

Kathryn Demanelis, Maria Argos, Lin Tong, Justin Shinkle, Mekala Sabarinathan, Muhammad Rakibuz-Zaman, Golam Sarwar, Hasan Shahriar, Tariqul Islam, Mahfuzar Rahman, Mohammad Yunus, Joseph H. Graziano, Karin Broberg, Karin Engström, Farzana Jasmine, Habibul Ahsan, and Brandon L. Pierce

#### **Table of Contents**

**Figure S1.** QQ-plot of epigenome-wide analysis results of log<sub>2</sub>-transformed urinary arsenic concentration (creatinine-adjusted) in HEALS (n=396).

**Figure S2.** Urinary arsenic concentration (creatinine-adjusted) and DNA methylation at arsenic-associated CpGs (FDR < 0.05) in HEALS and reported Pearson correlations.

**Figure S3.** Relationship between water and urinary arsenic measurements in HEALS (n=396).

**Figure S4.** QQ-plot of the observed p-values from epigenome-wide analysis of log<sub>2</sub>-transformed water arsenic concentration in HEALS (n=396).

**Figure S5.** Genome-wide associations between log<sub>2</sub>-transformed water arsenic concentration and CpG site-specific methylation in HEALS (n=396).

**Figure S6.** QQ-plot of epigenome-wide analysis results for log<sub>2</sub>-transformed urinary arsenic concentration (creatinine-adjusted) in BEST (n=400).

**Figure S7.** Genome-wide associations between log<sub>2</sub>-transformed urinary arsenic concentration (creatinine-adjusted) and CpG site-specific methylation in BEST (n=400).

**Figure S8.** Enrichment of urinary arsenic-associated CpGs identified in meta-analysis of HEALS (n=396) and BEST (n=400) within genomic features stratified by direction of association (FDR < 0.05).

**Table S1.** Results from different epigenome-wide analysis methods and exposure modeling in HEALS (n=396).

**Table S2.** Association between estimated cell type proportions and log<sub>2</sub>-transformed urinary arsenic concentration (creatinine-adjusted) in HEALS (n=396).

**Table S3.** Regions of methylation associated with log<sub>2</sub>-transformed urinary arsenic concentration in HEALS (minimum FDR < 10<sup>-4</sup>).

**Table S4.** Results from gene set enrichment analysis based on KEGG pathways for genes annotating to urinary arsenic-associated CpGs from HEALS discovery analysis and meta-analysis of HEALS and BEST.

**Table S5.** CpGs associated with log<sub>2</sub>-transformed urinary arsenic from meta-analysis ( $p < 1.3 \times 10^{-7}$ ) and their relationship with gene expression in BEST (n=371).

**Table S6.** Summary of cis-mQTLs results from HEALS (n=389) for CpGs identified in meta-analysis.

**Table S7.** Summary of disease and trait associations with genetic variants within or near genes annotated to urinary arsenic-associated CpGs from the GWAS Catalog.

**Additional File-** Excel Document

**References**

**Figure S1.** QQ-plot of epigenome-wide analysis results of  $\log_2$ -transformed urinary arsenic concentration (creatinine-adjusted) in HEALS (n=396).

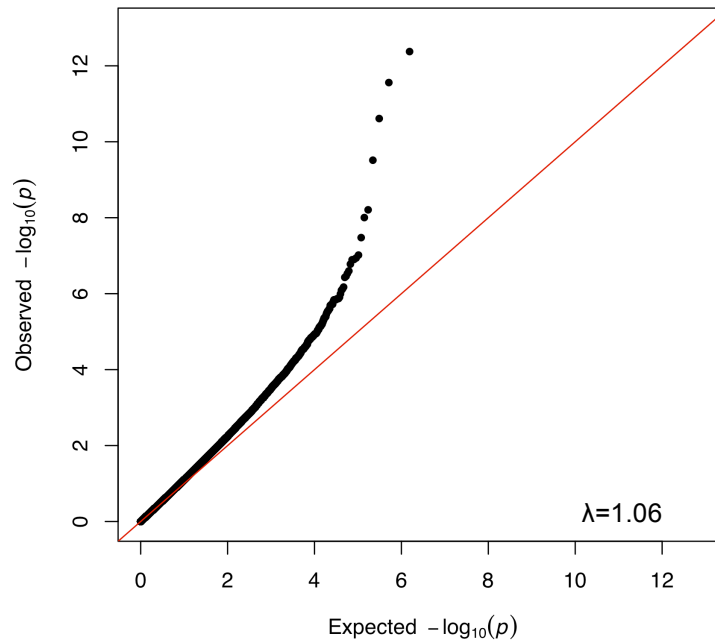

Using data from the EPIC (850K) array, associations between  $\log_2$ -transformed urinary arsenic concentration (creatinine-adjusted) and DNA methylation was evaluated at 771,192 CpGs and adjusted for sex, age, BMI, smoking status, and estimated SVs (n=27). The QQ-plot shows the observed p-values. The red line represents the expected distribution of p-values under the null, and  $\lambda$  corresponds to the genomic inflation factor (see **Methods**).

**Figure S2.** Urinary arsenic concentration (creatinine-adjusted) and DNA methylation at arsenic-associated CpGs (FDR < 0.05) in HEALS and reported Pearson correlations.

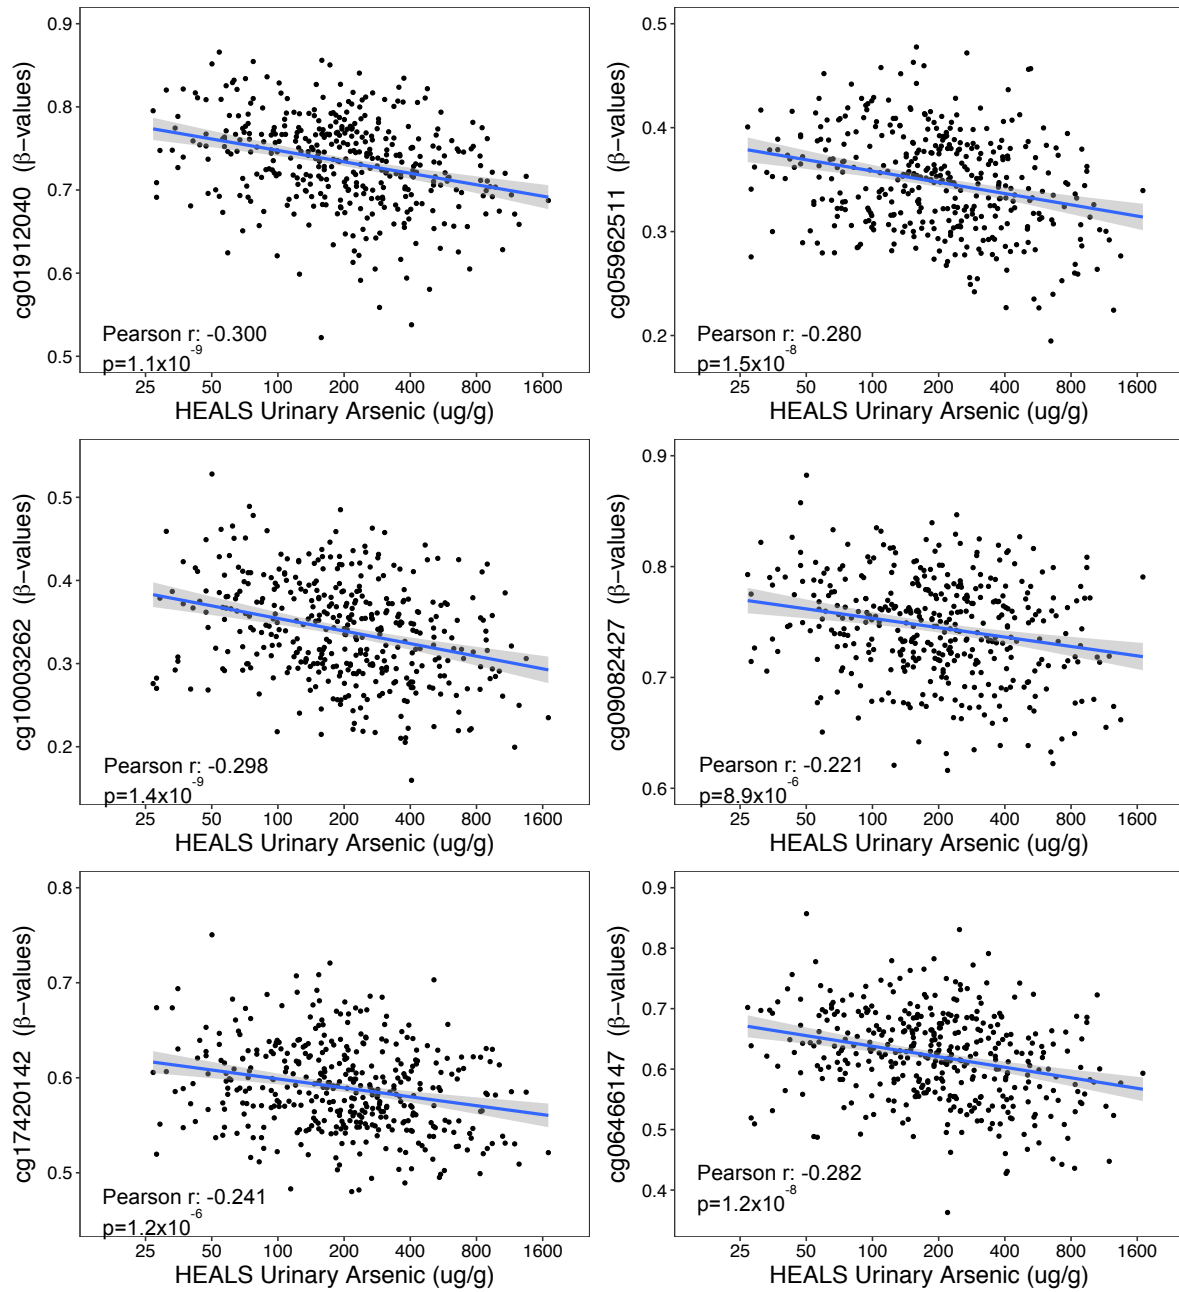

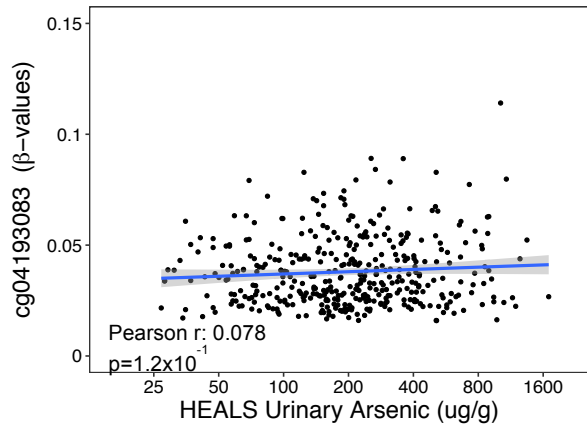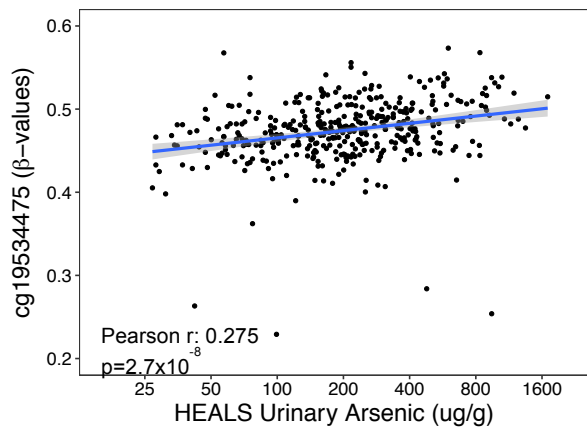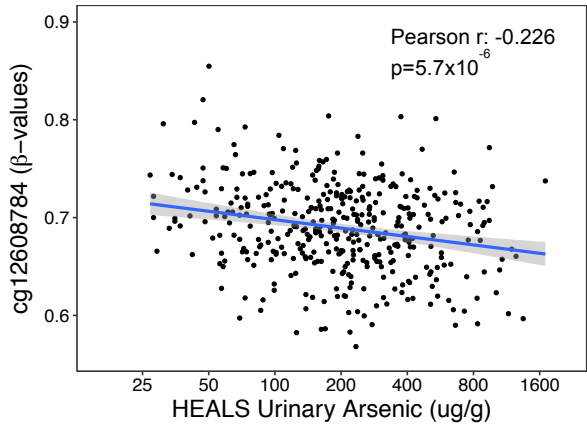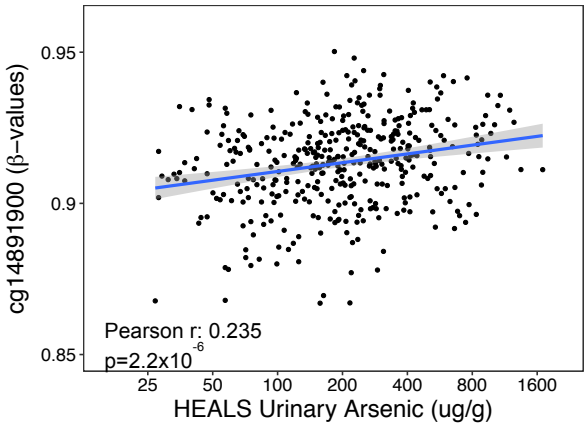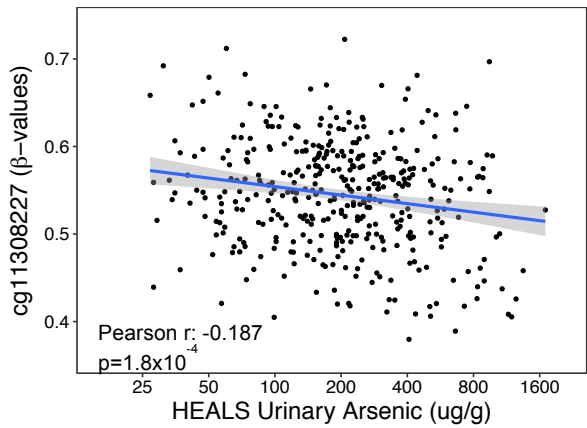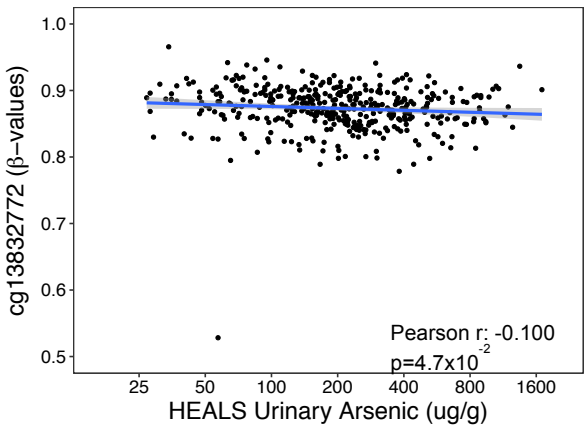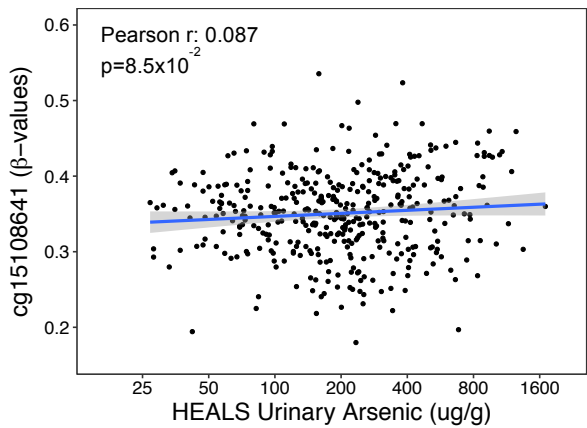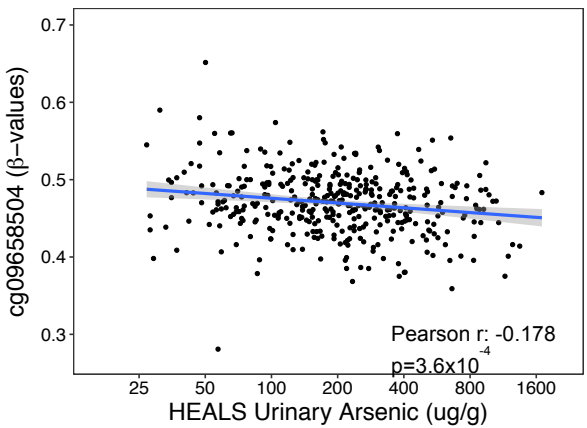

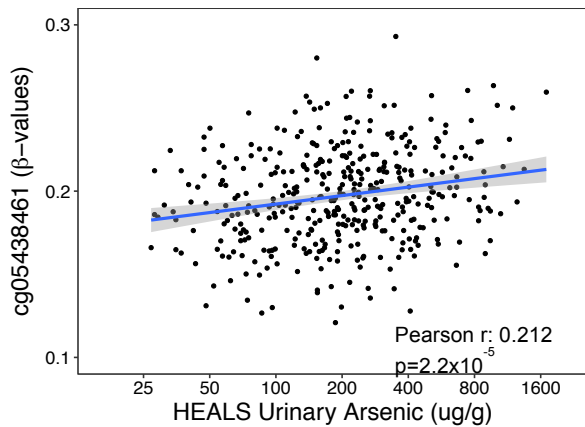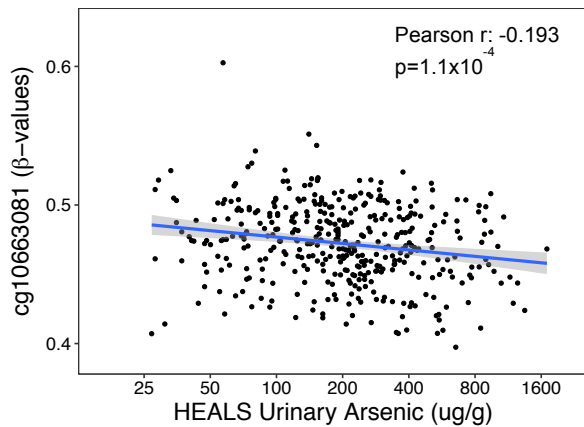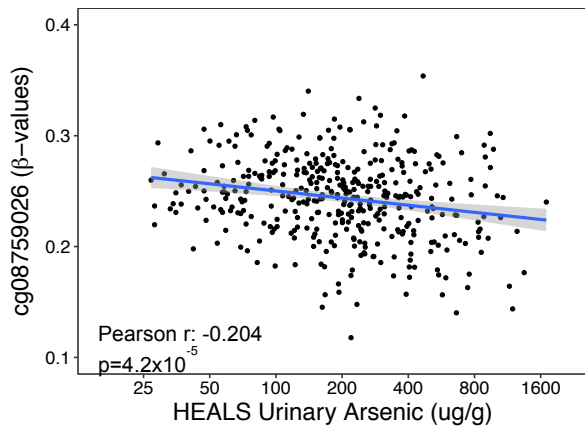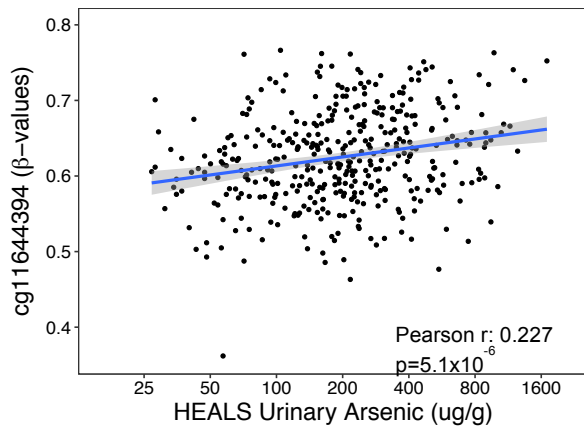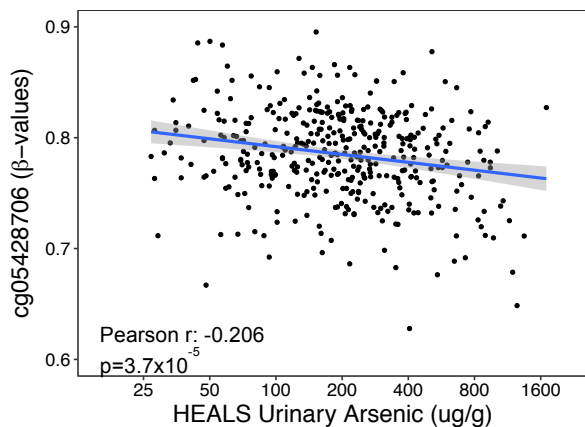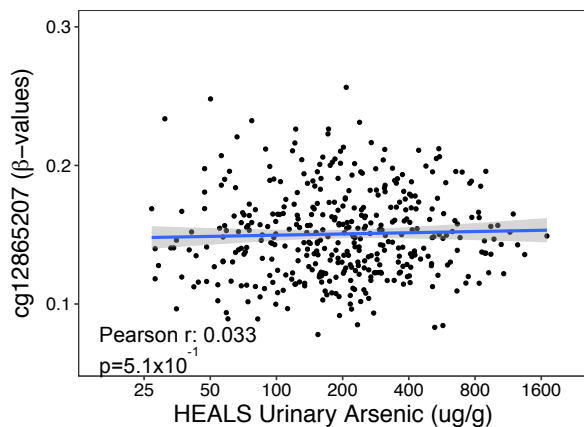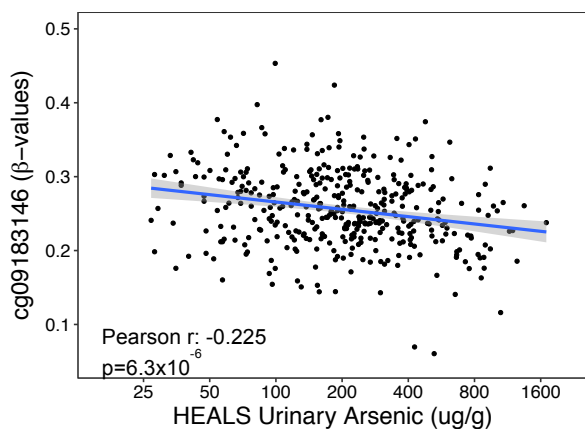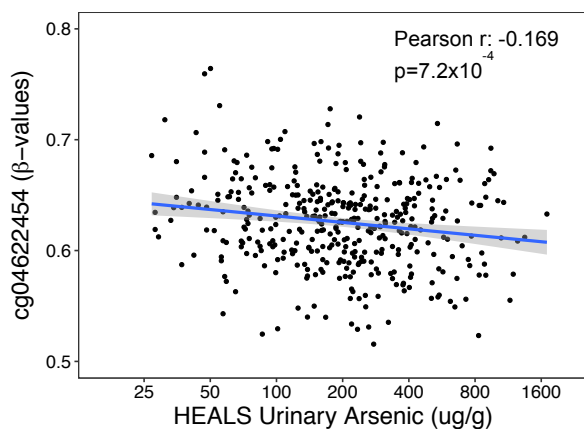

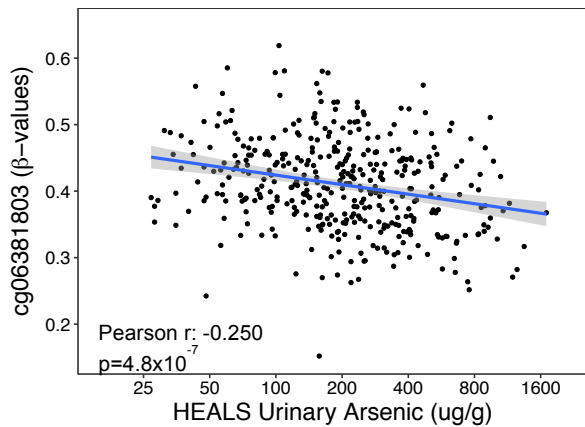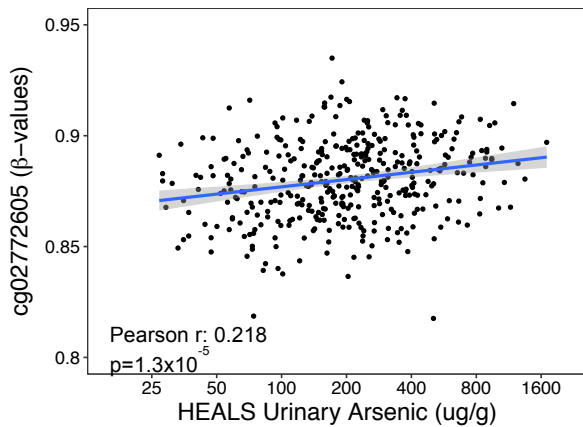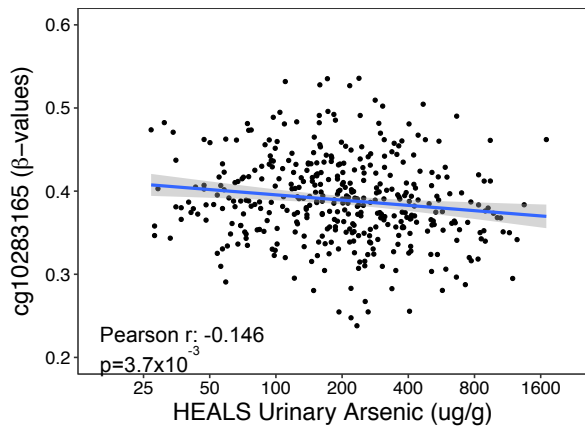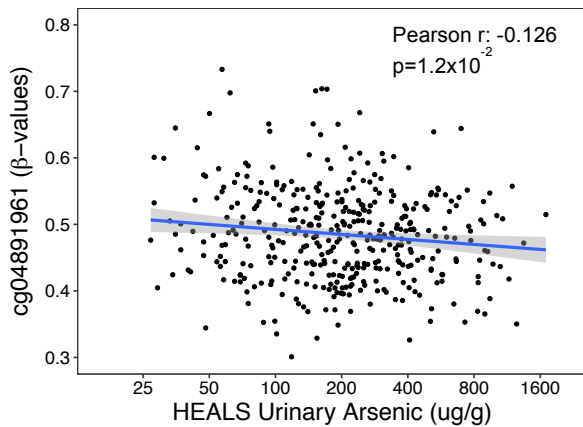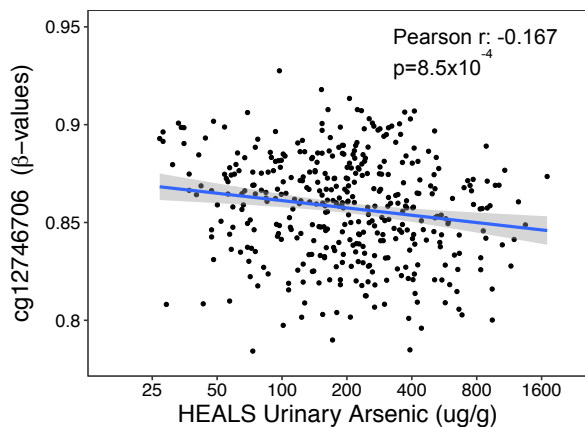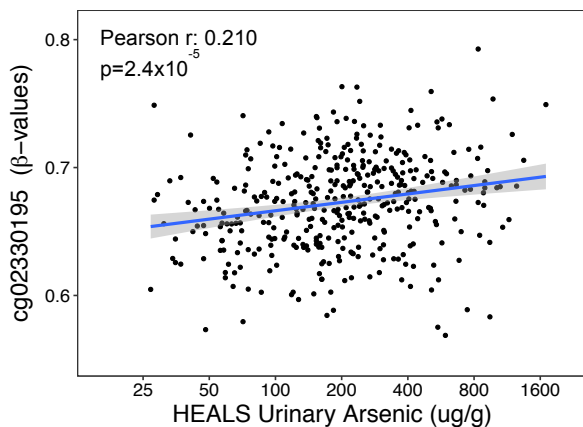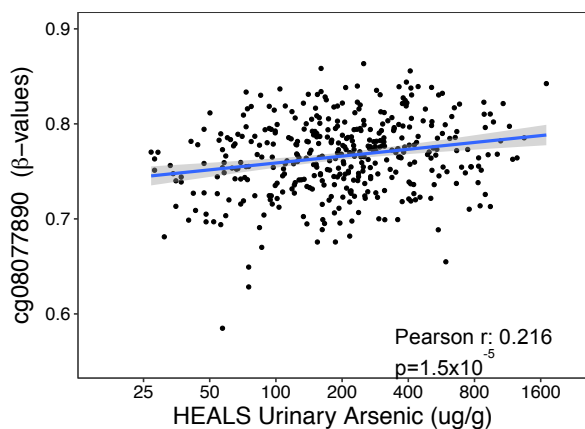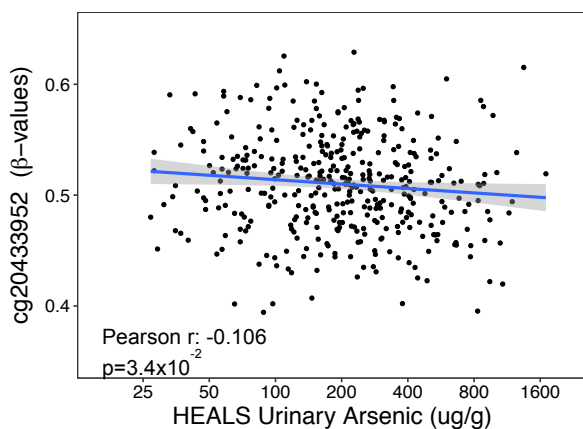

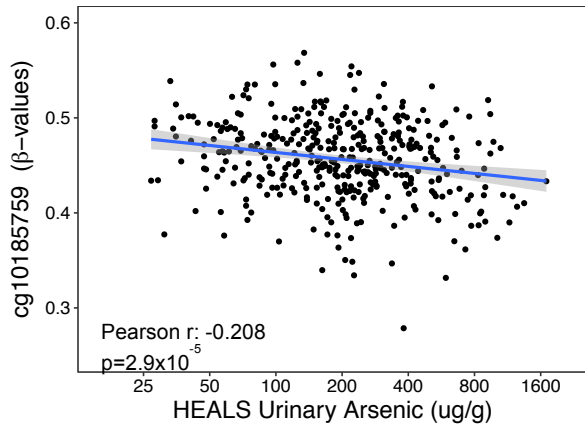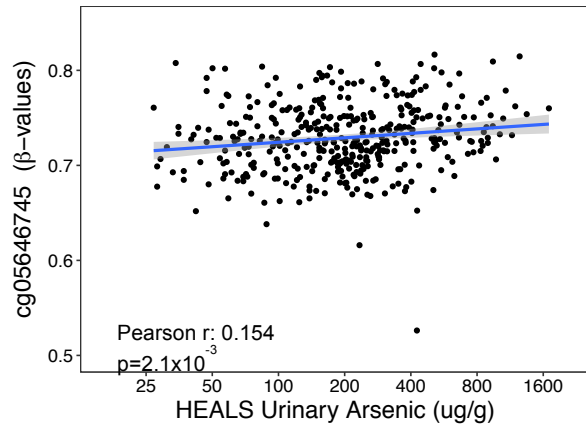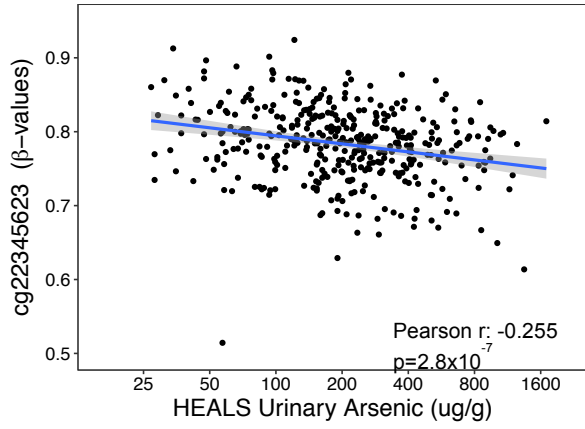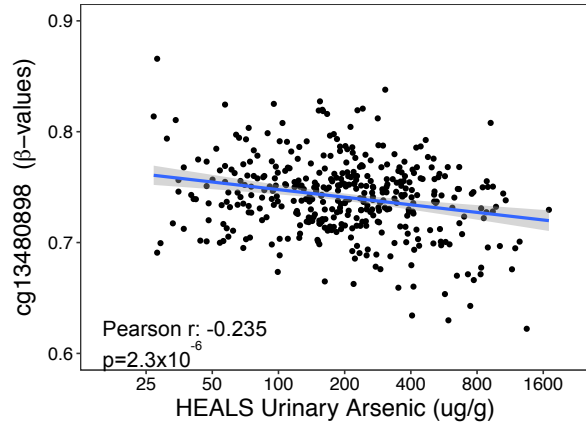



**Figure S3.** Relationship between water and urinary arsenic measurements in HEALS (n=396).

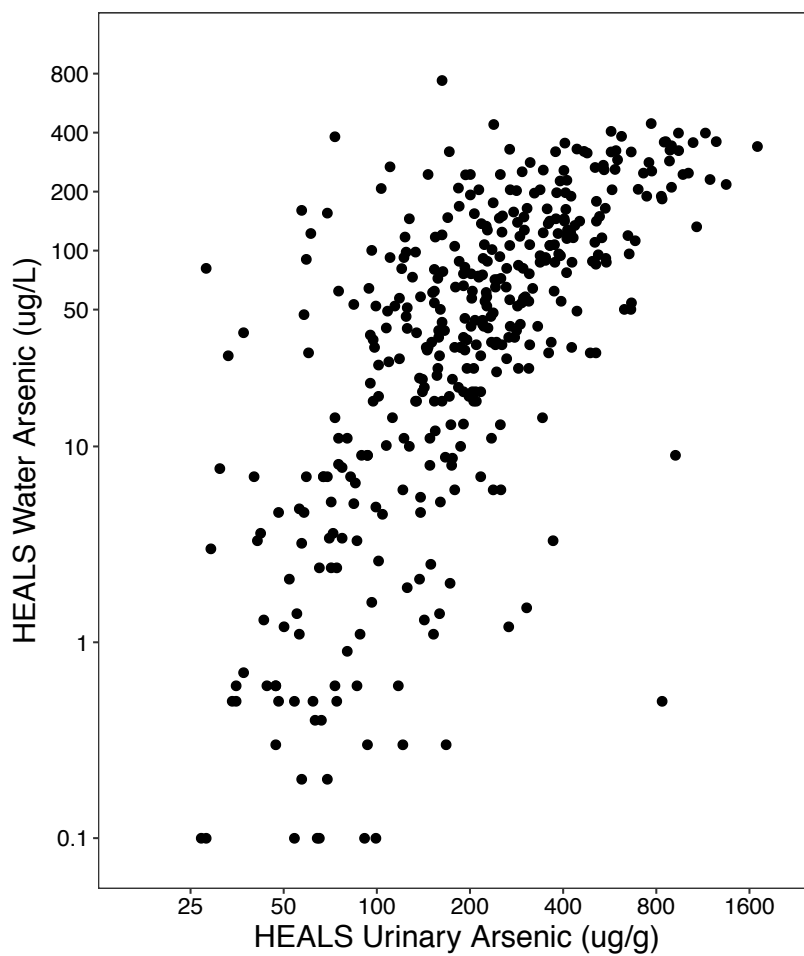

The Pearson correlation between untransformed continuous water and urinary arsenic (creatinine-adjusted) was 0.61 ( $p < 10^{-16}$ ). The correlation between  $\log_2$ -transformed continuous water and urinary arsenic (creatinine-adjusted) was 0.68 ( $p < 10^{-16}$ ).

**Figure S4.** QQ-plot of the observed p-values from epigenome-wide analysis of  $\log_2$ -transformed water arsenic concentration in HEALS (n=396).

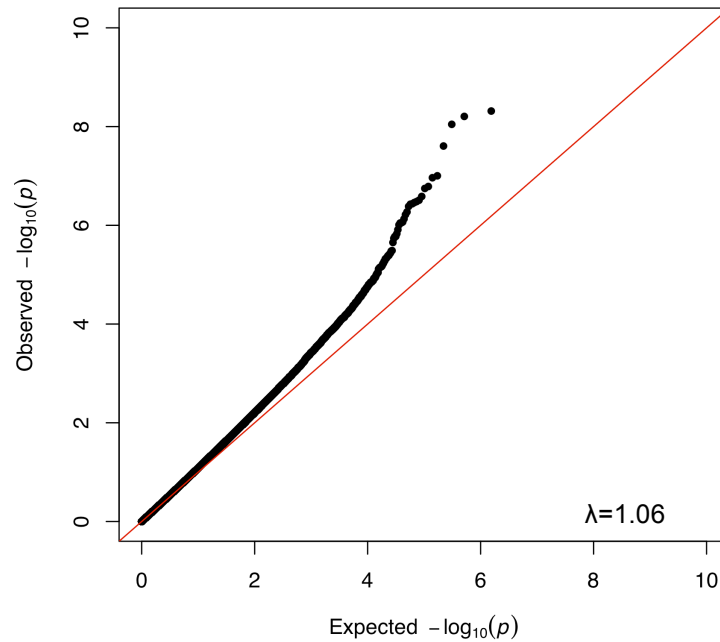

Using data from the EPIC (850K) array, the association between  $\log_2$ -transformed water arsenic concentration and DNA methylation was evaluated at 771,192 CpGs and adjusted for sex, age, BMI, smoking status, and estimated SVs (n=27). The QQ-plot shows the observed p-values. The red line represents expected distribution of p-values under the null, and  $\lambda$  corresponds to the genomic inflation factor.

**Figure S5.** Genome-wide associations between  $\log_2$ -transformed water arsenic concentration and CpG site-specific methylation in HEALS (n=396).

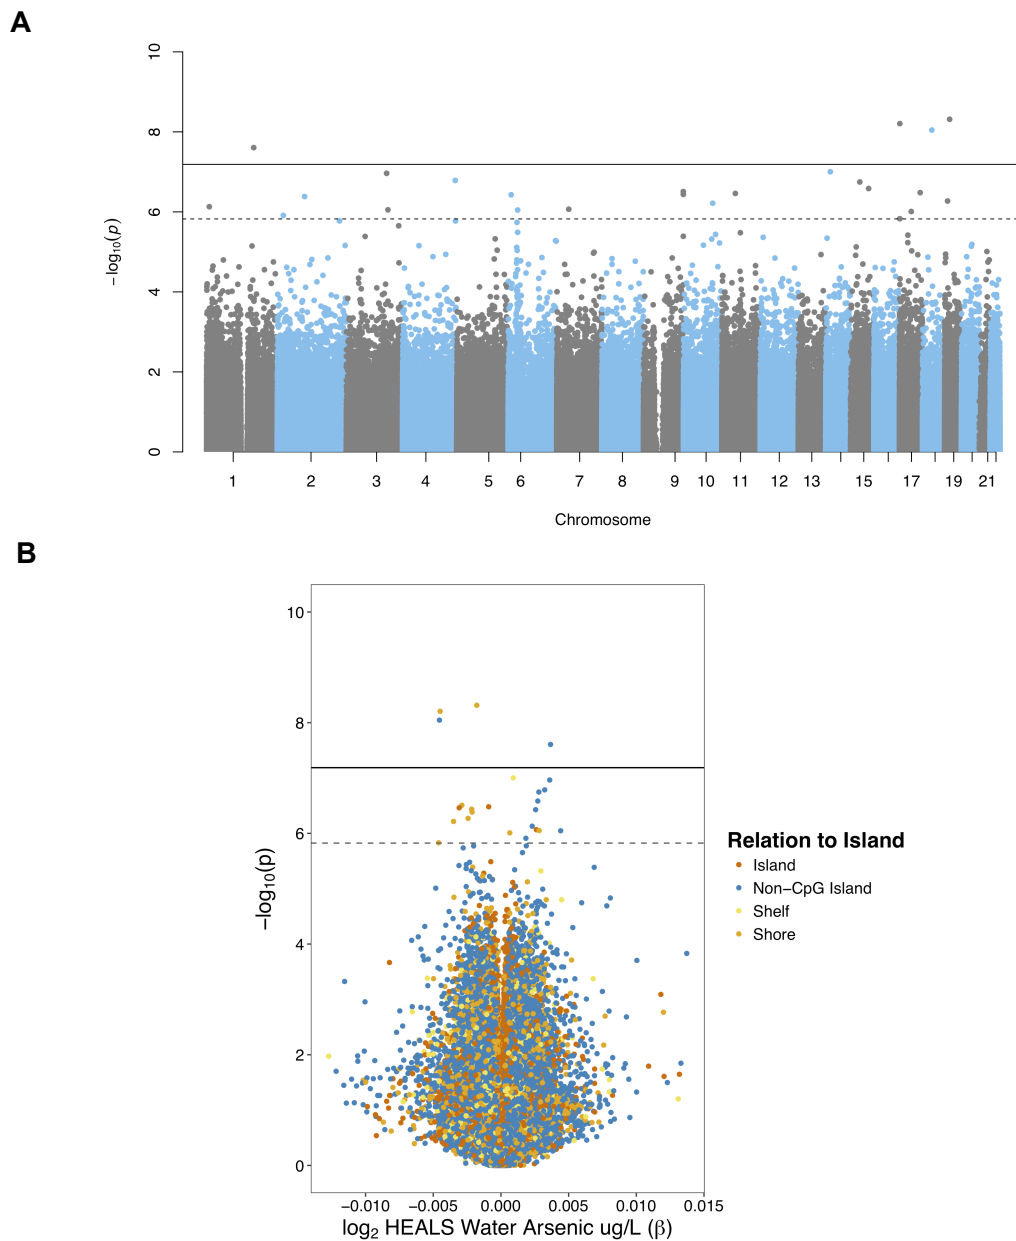

Using data from the EPIC (850K) array, associations between  $\log_2$ -transformed water arsenic concentration and DNA methylation were evaluated at 771,192 CpGs. **(A)** Manhattan plot of the location of each CpG and p-value for each arsenic-CpG association. **(B)** Volcano plot presenting association estimate and p-value for each arsenic-CpG association. Colors correspond to each CpG's relationship to CpG islands. In **A** and **B**, solid and dashed lines designate epigenome-wide significance (Bonferroni threshold  $p=6.5 \times 10^{-8}$ ) and FDR < 0.05 ( $p=1.5 \times 10^{-6}$ ), respectively.

**Figure S6.** QQ-plot of epigenome-wide analysis results for  $\log_2$ -transformed urinary arsenic concentration (creatinine-adjusted) in BEST (n=400).

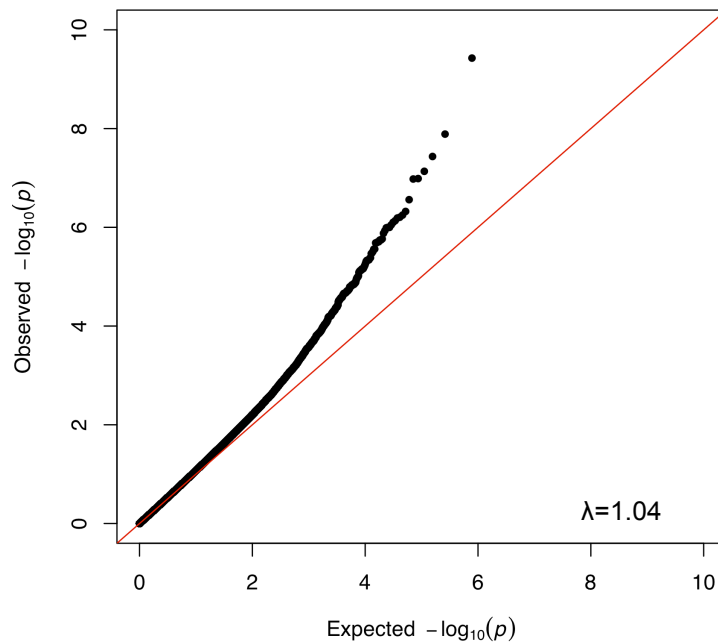

Using data from the 450K array, association between  $\log_2$ -transformed urinary arsenic concentration (creatinine-adjusted) and DNA methylation was evaluated at 390,810 CpGs and adjusted for sex, age, BMI, smoking status, and estimated SVs (n=24). The QQ-plot shows the observed p-values. The red line represents expected distribution of p-values under the null, and  $\lambda$  corresponds to the genomic inflation factor.

**Figure S7.** Genome-wide associations between  $\log_2$ -transformed urinary arsenic concentration (creatinine-adjusted) and CpG site-specific methylation in BEST (n=400).

**A**

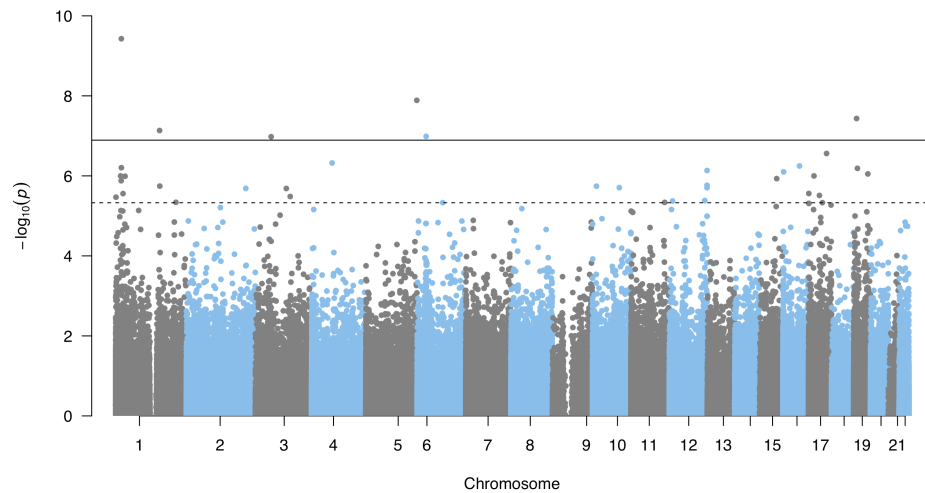

**B**

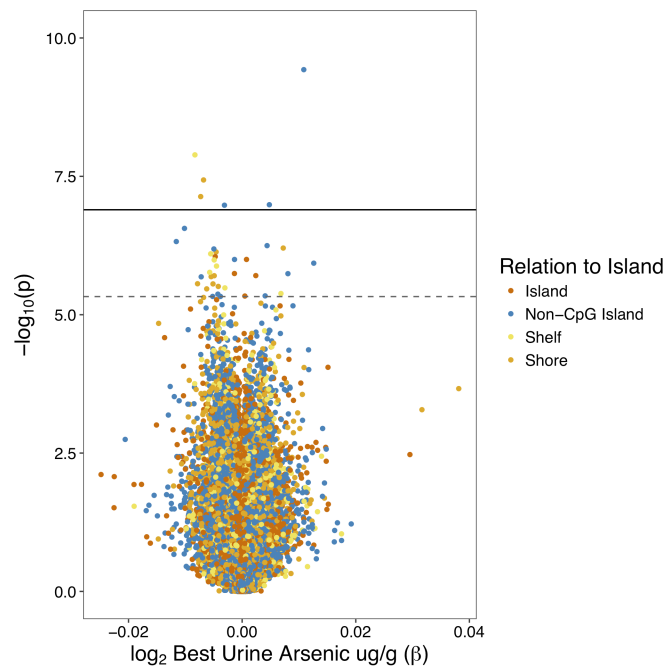

Using data from the 450K array, association between  $\log_2$ -transformed urinary arsenic and methylation was evaluated at 390,810 CpGs. **(A)** Manhattan plot of the location of each CpG and p-value for each arsenic-CpG association. **(B)** Volcano plot presents association estimate and p-value for each arsenic-CpG association. Colors correspond to CpG's relationship to island. In **A** and **B**, solid and dashed lines designate epigenome-wide significance (Bonferroni threshold  $p=1.3 \times 10^{-7}$ ) and  $FDR < 0.05$  ( $p=4.7 \times 10^{-6}$ ), respectively.

**Figure S8.** Enrichment of urinary arsenic-associated CpGs identified in meta-analysis of HEALS (n=396) and BEST (n=400) within genomic features stratified by direction of association (FDR < 0.05).

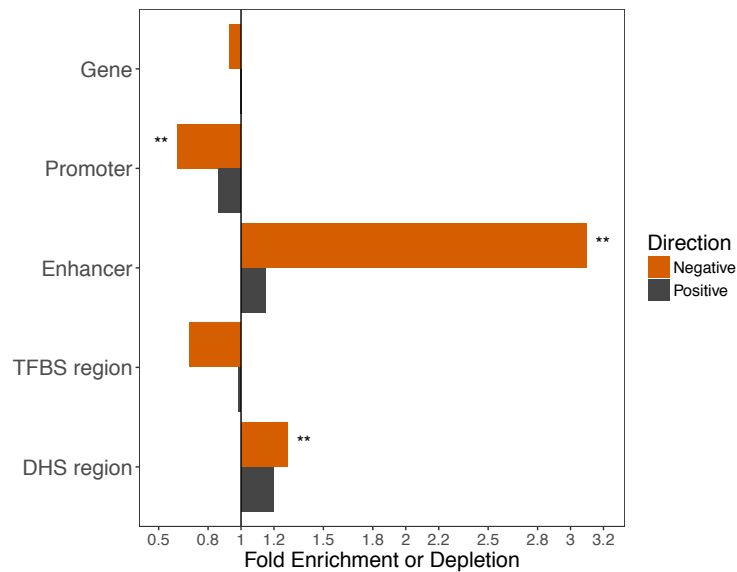

Arsenic-associated CpGs (FDR < 0.05) from meta-analysis of HEALS and BEST (n=221) were stratified by direction of association with urinary arsenic (negative [n=170] and positive [n=51]). Fold enrichment (FE) are plotted for each genomic feature comparing urinary arsenic-associated CpGs with FDR of 0.05 to the remaining CpGs below FDR of 0.05. Abbreviations correspond to transcription factor binding site (TFBS) and DNase I hypersensitive site (DHS). P-values are obtained from  $\chi^2$ -test comparing distribution of CpGs above and below FDR of 0.05 for each genomic feature ( $p < 0.05$  [\*],  $p < 10^{-3}$  [\*\*], and  $p < 10^{-6}$  [\*\*\*]).

**Table S1.** Results from different epigenome-wide analysis methods and exposure modeling in HEALS (n=396).

| Analysis Method                 | Modeled Exposure               | Arsenic-associated CpGs identified |                                         |            | Overlap with log <sub>2</sub> -transformed arsenic-associated CpGs identified from SV adjusted model (FDR < 0.05, n=34) |               |            |
|---------------------------------|--------------------------------|------------------------------------|-----------------------------------------|------------|-------------------------------------------------------------------------------------------------------------------------|---------------|------------|
|                                 |                                | $\lambda^d$                        | Bonferroni ( $p < 6.5 \times 10^{-8}$ ) | FDR < 0.05 | FDR < 0.05                                                                                                              | $p < 10^{-4}$ | $p < 0.05$ |
| SV adjusted <sup>b</sup>        | log2-transformed continuous    | 1.06                               | 7                                       | 34         | NA                                                                                                                      | NA            | NA         |
| SV adjusted <sup>b</sup>        | untransformed continuous       | 1.05                               | 9                                       | 37         | 16                                                                                                                      | 29            | 34         |
| SV adjusted <sup>b</sup>        | ordinal quartiles <sup>a</sup> | 1.05                               | 6                                       | 11         | 11                                                                                                                      | 32            | 34         |
| Cell-type adjusted <sup>c</sup> | log2-transformed continuous    | 1.33                               | 14                                      | 2191       | 23                                                                                                                      | 23            | 33         |
| Unadjusted (no covariates)      | log2-transformed continuous    | 1.17                               | 10                                      | 382        | 18                                                                                                                      | 21            | 31         |

All models adjusted for sex, age, smoking status, and BMI (except for unadjusted model that contains only log<sub>2</sub>-transformed urinary arsenic). Overlap was determined by examining the number of arsenic-associated CpGs identified in each analysis at different significance threshold (FDR < 0.05,  $p < 10^{-4}$  (suggestive epigenome-wide significance), and nominal  $p < 0.05$ ) that were identified among the log<sub>2</sub>-transformed arsenic-associated CpGs (FDR < 0.05, n=34) from covariate and SV adjusted analysis.

<sup>a</sup> An ordinal variable across integer-coded quartiles [1<sup>st</sup> (<113.5 ug/g), 2<sup>nd</sup> (113.5-201.5 ug/g), 3<sup>rd</sup> (201.5-350 ug/g), 4<sup>th</sup> (> 350 ug/g)].

<sup>b</sup> SV-adjusted model adjusts for covariates and 27 estimated surrogate variables based on Leek et al 2012.

<sup>c</sup> Cell-type adjusted model adjusts for covariates and estimated cell type proportions (monocytes, B-cells, CD4T, CD8T, granulocytes, and natural killer cells) based on Houseman et al 2012.

<sup>d</sup>  $\lambda$  corresponds to genomic inflation factor.

**Table S2.** Association between estimated cell type proportions and log<sub>2</sub>-transformed urinary arsenic concentration (creatinine-adjusted) in HEALS (n=396).

| Estimate Cell Type (%) | mean (sd)  | Pearson Correlation | p (correlation) | β (se)     | p      |
|------------------------|------------|---------------------|-----------------|------------|--------|
| Bcell                  | 7.9 (2.9)  | -0.110              | 0.0293          | -0.2 (0.1) | 0.0588 |
| CD4T                   | 13.9 (4.4) | -0.105              | 0.0371          | -0.5 (0.2) | 0.0136 |
| CD8T                   | 4.3 (4.3)  | 0.024               | 0.6299          | 0.0 (0.2)  | 0.8694 |
| Gran                   | 60.9 (9.2) | 0.096               | 0.0556          | 0.8 (0.4)  | 0.0482 |
| Mono                   | 5.7 (2.4)  | -0.007              | 0.8850          | 0.0 (0.1)  | 0.6207 |
| NK                     | 7.3 (4.6)  | -0.043              | 0.3906          | -0.2 (0.2) | 0.3772 |

Reported Pearson correlation between each cell type proportion and log<sub>2</sub>-transformed urinary arsenic concentration (creatinine-adjusted) in HEALS. Estimated cell types expressed as percentages. Results from linear model were adjusted for age, sex, smoking status, and BMI.



**Table S3.** Regions of methylation associated with log<sub>2</sub>-transformed urinary arsenic concentration in HEALS (minimum FDR < 10<sup>-4</sup>).

| Chromosome | Start     | End       | Gene           | Location                                     | Region Width (basepairs) | minimum FDR | # CpGs (CpGs p<0.05) | Mean Effect Size (β) |
|------------|-----------|-----------|----------------|----------------------------------------------|--------------------------|-------------|----------------------|----------------------|
| 17         | 1106553   | 1107460   |                |                                              | 908                      | 6.4E-26     | 6(6)                 | -0.008               |
| 9          | 140348828 | 140349969 | NSMF           | Body                                         | 1142                     | 6.7E-20     | 10(4)                | -0.003               |
| 10         | 102729375 | 102730130 |                |                                              | 756                      | 6.7E-20     | 4(3)                 | -0.005               |
| 17         | 79201972  | 79203106  | TEPSIN         | Body/3'UTR                                   | 1135                     | 1.7E-16     | 9(7)                 | -0.005               |
| 16         | 68000829  | 68002044  | SLC12A4        | Promoter, Body                               | 1216                     | 7.8E-12     | 8(6)                 | -0.002               |
| 3          | 101443258 | 101443992 | CEP97          | Promoter, 1st Exon, Body                     | 735                      | 1.3E-10     | 13(10)               | 0.002                |
| 10         | 135172031 | 135172491 | FUOM           | Promoter                                     | 461                      | 1.9E-10     | 3(2)                 | 0.003                |
| 19         | 46998383  | 46999757  | PNMAL2         | Promoter, 5'UTR, 1st Exon                    | 1375                     | 1.5E-09     | 15(9)                | -0.003               |
| 1          | 161171116 | 161172291 | NDUF52         | Promoter, 5'UTR                              | 1176                     | 2.0E-09     | 17(7)                | 0.002                |
| 6          | 31870476  | 31870990  | ZBTB12         | Promoter                                     | 515                      | 1.4E-08     | 7(5)                 | 0.004                |
| 17         | 17109800  | 17110641  | PLD6           | Promoter                                     | 842                      | 3.0E-08     | 9(6)                 | -0.007               |
| 4          | 4763259   | 4763753   |                |                                              | 495                      | 4.3E-08     | 7(6)                 | 0.007                |
| 22         | 50739843  | 50740499  | PLXNB2         | 5'UTR                                        | 657                      | 5.3E-08     | 5(5)                 | -0.004               |
| 11         | 2919689   | 2920735   | SLC22A18       | Promoter                                     | 1047                     | 6.5E-08     | 15(9)                | -0.003               |
| 1          | 84326185  | 84326856  |                |                                              | 672                      | 1.4E-07     | 9(8)                 | -0.003               |
| 19         | 49843160  | 49843922  | CD37           | Body, 3'UTR                                  | 763                      | 1.4E-07     | 5(4)                 | -0.005               |
| 11         | 64980819  | 64981596  | SLC22A20       | Promoter, 1st Exon                           | 778                      | 1.4E-07     | 9(9)                 | -0.005               |
| 19         | 40871421  | 40871823  | PLD3           | 5'UTR                                        | 403                      | 1.6E-07     | 4(4)                 | -0.007               |
| 10         | 77164720  | 77165618  | C10orf41       | Body                                         | 899                      | 5.1E-07     | 7(6)                 | 0.006                |
| 9          | 139648911 | 139649039 | LCN8           | Body, 3'UTR                                  | 129                      | 6.0E-07     | 2(2)                 | -0.008               |
| 1          | 9375862   | 9376492   | SPSB1          | 5'UTR                                        | 631                      | 7.8E-07     | 3(3)                 | -0.005               |
| 6          | 32063459  | 32064258  | TNXB           | Body                                         | 800                      | 9.0E-07     | 24(12)               | 0.006                |
| 6          | 32847441  | 32847845  | PPP1R2P1       | Body                                         | 405                      | 1.3E-06     | 13(10)               | 0.005                |
| 5          | 171986065 | 171986331 |                |                                              | 267                      | 1.8E-06     | 4(4)                 | 0.005                |
| 19         | 18496756  | 18497201  | GDF15          | Promoter, 5'UTR, 1st Exon                    | 446                      | 1.8E-06     | 7(7)                 | -0.004               |
| 1          | 155188904 | 155188982 | GBAP1          | Body                                         | 79                       | 2.0E-06     | 2(1)                 | -0.009               |
| 17         | 42081594  | 42082036  | NAGS/PYY       | Promoter, 1st Exon/Promoter, 1st Exon, 5'UTR | 443                      | 2.1E-06     | 10(6)                | -0.002               |
| 17         | 41323431  | 41323562  | NBR1           | 5'UTR                                        | 132                      | 2.2E-06     | 2(2)                 | 0.001                |
| 17         | 27939837  | 27939900  | ANKRD13B       | Body, Exon Binding                           | 64                       | 2.4E-06     | 2(2)                 | -0.008               |
| 10         | 102279330 | 102280155 | SEC31B         | Promoter, 5'UTR                              | 826                      | 6.4E-06     | 14(9)                | 0.003                |
| 20         | 48185517  | 48186174  | PTGIS          | Promoter                                     | 658                      | 6.4E-06     | 5(5)                 | -0.008               |
| 7          | 73476337  | 73476675  | ELN            | Body                                         | 339                      | 6.9E-06     | 4(3)                 | 0.004                |
| 13         | 27999177  | 27999546  | GTF3A          | Body                                         | 370                      | 7.0E-06     | 4(4)                 | -0.011               |
| 14         | 63671356  | 63671737  | RHOJ           | 5'UTR, 1st exon                              | 382                      | 1.0E-05     | 4(4)                 | -0.021               |
| 10         | 134254845 | 134255097 |                |                                              | 253                      | 1.1E-05     | 4(2)                 | -0.002               |
| 19         | 17375523  | 17375799  | USHBP1         | Promoter                                     | 277                      | 1.3E-05     | 4(2)                 | -0.002               |
| 4          | 165877875 | 165878219 | C4orf39/TRIM61 | Promoter/Body                                | 345                      | 1.8E-05     | 7(6)                 | -0.004               |
| 2          | 209224225 | 209224437 | PTH2R          | Promoter                                     | 213                      | 1.9E-05     | 5(4)                 | -0.005               |
| 6          | 31607340  | 31607648  | BAT3           | Body                                         | 309                      | 2.6E-05     | 5(3)                 | 0.004                |
| 2          | 241856000 | 241856143 |                |                                              | 144                      | 3.4E-05     | 3(3)                 | 0.008                |
| 17         | 39968838  | 39969397  | FKBP10/P3H4    | Promoter,5'UTR, 1st Exon / Promoter          | 560                      | 3.4E-05     | 10(4)                | -0.002               |
| 19         | 7764345   | 7764649   | FCER2          | Body                                         | 305                      | 4.2E-05     | 3(2)                 | -0.005               |
| 8          | 39172020  | 39172120  | ADAM5P         | Promoter                                     | 101                      | 5.5E-05     | 6(4)                 | 0.008                |
| 16         | 4421445   | 4421486   | VASN/CORO7     | Promoter/Body                                | 42                       | 7.3E-05     | 2(2)                 | -0.003               |
| 12         | 4417142   | 4417170   |                |                                              | 29                       | 9.2E-05     | 2(2)                 | 0.011                |

Analyzed using DMRcate (Peters et al. 2015) and tested for regions with  $\lambda=1,000$  basepairs and  $C=2$ . Gene assignments and genic locations are based on UCSC gene annotation. Mean effect size ( $\beta$ ) is average change in methylation (expressed as beta-values) associated with log<sub>2</sub>-transformed urinary arsenic concentration across the differentially methylated region (DMR).

**Table S4.** Results from gene set enrichment analysis based on KEGG pathways for genes annotating to urinary arsenic-associated CpGs from HEALS discovery analysis and meta-analysis of HEALS and BEST.

|                                                            | top 500 CpGs <sup>a</sup> |       |                      | FDR < 0.05 <sup>b</sup> |                      |
|------------------------------------------------------------|---------------------------|-------|----------------------|-------------------------|----------------------|
|                                                            | n                         | genes | p                    | genes                   | p                    |
| <b>HEALS</b>                                               |                           |       |                      |                         |                      |
| Hematopoietic cell lineage                                 | 90                        | 4     | 3.7x10 <sup>-2</sup> |                         |                      |
| <b>META-ANALYSIS</b>                                       |                           |       |                      |                         |                      |
| African trypanosomiasis                                    | 34                        | 4     | 2.2x10 <sup>-3</sup> | 2                       | 2.6x10 <sup>-2</sup> |
| Malaria                                                    | 44                        | 4     | 7.0x10 <sup>-3</sup> | 2                       | 4.7x10 <sup>-2</sup> |
| Pancreatic secretion                                       | 91                        | 6     | 1.2x10 <sup>-2</sup> | 4                       | 1.1x10 <sup>-2</sup> |
| Ether lipid metabolism                                     | 47                        | 3     | 3.9x10 <sup>-2</sup> | 2                       | 4.5x10 <sup>-2</sup> |
| Linoleic acid metabolism                                   | 29                        | 2     | 4.0x10 <sup>-2</sup> | 2                       | 9.4x10 <sup>-3</sup> |
| alpha-Linolenic acid metabolism                            | 25                        | 2     | 4.5x10 <sup>-2</sup> | 2                       | 1.1x10 <sup>-2</sup> |
| Ras signaling pathway                                      | 223                       | 10    | 4.8x10 <sup>-2</sup> | 6                       | 3.7x10 <sup>-2</sup> |
| Rheumatoid arthritis                                       | 85                        | 6     | 2.8x10 <sup>-3</sup> |                         |                      |
| Cell adhesion molecules (CAMs)                             | 135                       | 9     | 2.9x10 <sup>-3</sup> |                         |                      |
| Morphine addiction                                         | 88                        | 8     | 3.9x10 <sup>-3</sup> |                         |                      |
| T cell receptor signaling pathway                          | 97                        | 7     | 5.0x10 <sup>-3</sup> |                         |                      |
| Osteoclast differentiation                                 | 118                       | 7     | 7.4x10 <sup>-3</sup> |                         |                      |
| Epithelial cell signaling in Helicobacter pylori infection | 66                        | 5     | 8.1x10 <sup>-3</sup> |                         |                      |
| Rap1 signaling pathway                                     | 203                       | 11    | 1.3x10 <sup>-2</sup> |                         |                      |
| MAPK signaling pathway                                     | 283                       | 14    | 1.3x10 <sup>-2</sup> |                         |                      |
| Chagas disease (American trypanosomiasis)                  | 98                        | 6     | 1.4x10 <sup>-2</sup> |                         |                      |
| Collecting duct acid secretion                             | 27                        | 3     | 1.4x10 <sup>-2</sup> |                         |                      |
| Estrogen signaling pathway                                 | 137                       | 8     | 1.5x10 <sup>-2</sup> |                         |                      |
| Th17 cell differentiation                                  | 102                       | 6     | 2.0x10 <sup>-2</sup> |                         |                      |
| Vibrio cholerae infection                                  | 49                        | 4     | 2.1x10 <sup>-2</sup> |                         |                      |
| NF-kappa B signaling pathway                               | 89                        | 5     | 2.9x10 <sup>-2</sup> |                         |                      |
| Intestinal immune network for IgA production               | 44                        | 3     | 3.0x10 <sup>-2</sup> |                         |                      |
| Alcoholism                                                 | 165                       | 7     | 3.5x10 <sup>-2</sup> |                         |                      |
| Calcium signaling pathway                                  | 178                       | 9     | 3.8x10 <sup>-2</sup> |                         |                      |
| Hematopoietic cell lineage                                 | 90                        | 4     | 3.8x10 <sup>-2</sup> |                         |                      |
| Staphylococcus aureus infection                            | 56                        | 3     | 4.1x10 <sup>-2</sup> |                         |                      |
| Amoebiasis                                                 | 92                        | 5     | 4.2x10 <sup>-2</sup> |                         |                      |
| Influenza A                                                | 143                       | 7     | 4.3x10 <sup>-2</sup> |                         |                      |
| Neuroactive ligand-receptor interaction                    | 315                       | 10    | 4.7x10 <sup>-2</sup> |                         |                      |
| Cysteine and methionine metabolism                         | 45                        | 3     | 4.8x10 <sup>-2</sup> |                         |                      |
| Metabolic pathways                                         | 1182                      |       |                      | 16                      | 2.4x10 <sup>-2</sup> |
| Fat digestion and absorption                               | 41                        |       |                      | 2                       | 3.3x10 <sup>-2</sup> |
| Acute myeloid leukemia                                     | 63                        |       |                      | 3                       | 3.6x10 <sup>-2</sup> |
| Homologous recombination                                   | 39                        |       |                      | 2                       | 4.0x10 <sup>-2</sup> |
| Retrograde endocannabinoid signaling                       | 133                       |       |                      | 4                       | 4.5x10 <sup>-2</sup> |
| Carbohydrate digestion and absorption                      | 37                        |       |                      | 2                       | 5.0x10 <sup>-2</sup> |

Gene annotations for arsenic-associated CpGs are provided as gene set input for the *gometh* function. Results are presented for KEGG pathways (n=324 sets) with at least two genes from arsenic-associated CpG gene set and p < 0.05. Table reports total number of genes in pathway (n), genes identified in pathway from CpG gene set, and p-value from CpG bias-corrected hypergeometric test. Background gene set for 450K is 19,246 genes and EPIC is 23,234 genes.

<sup>a</sup>Top 500 arsenic-associated CpGs, annotated to 348 unique genes in the HEALS discovery analysis (EPIC array), 338 unique genes in the meta-analysis (450K array).

<sup>b</sup>Arsenic-associated CpGs (FDR < 0.05), annotated to 21 unique genes in the HEALS discovery analysis, 153 unique genes in the meta-analysis

**Table S5.** CpGs associated with log<sub>2</sub>-transformed urinary arsenic from meta-analysis ( $p < 1.3 \times 10^{-7}$ ) and their relationship with gene expression in BEST (n=371).

| Name       | Chr | Position  | Nearest Gene | Feature  | Distance | Direction of Association | Gene Expression Analysis |                     |                          |                       |
|------------|-----|-----------|--------------|----------|----------|--------------------------|--------------------------|---------------------|--------------------------|-----------------------|
|            |     |           |              |          |          |                          | Illumina ID              | Pearson correlation | P <sub>correlation</sub> | P <sub>adjusted</sub> |
| cg13480898 | 19  | 10195914  | C19orf66     | Promoter | 892      | ↓↓                       | ILMN_1750400             | 0.163               | $1.6 \times 10^{-3}$     | $5.9 \times 10^{-3}$  |
| cg07207669 | 1   | 155102388 | EFNA1        | Body     | 2039     | ↓↓                       | ILMN_2371055             | 0.070               | $1.8 \times 10^{-1}$     | $1.4 \times 10^{-1}$  |
|            |     |           |              |          |          |                          | ILMN_2371053             | -0.021              | $6.9 \times 10^{-1}$     | $6.3 \times 10^{-1}$  |
| cg06381803 | 19  | 46119475  | EML2         | Body     | 29300    | ↓↓                       | ILMN_3240541             | -0.107              | $3.9 \times 10^{-2}$     | $1.8 \times 10^{-2}$  |
| cg09183146 | 16  | 1429863   | UNKL         | Promoter | 34842    | ↓↓                       | ILMN_1692826             | -0.044              | $4.0 \times 10^{-1}$     | $9.0 \times 10^{-1}$  |
|            |     |           |              |          |          |                          | ILMN_2126408             | 0.013               | $8.1 \times 10^{-1}$     | $6.2 \times 10^{-1}$  |
| cg08759026 | 11  | 69061454  | MYEOV        | Promoter | 159      | ↓↓                       | ILMN_2198413             | -0.083              | $1.1 \times 10^{-1}$     | $9.5 \times 10^{-2}$  |
| cg17489312 | 1   | 9376039   | SPSB1        | 5'UTR    | 23098    | ↓↓                       | ILMN_1714170             | 0.001               | $9.8 \times 10^{-1}$     | $9.3 \times 10^{-1}$  |
| cg00472758 | 16  | 2552820   | TBC1D24      | 3'UTR    | 4581     | ↓↓                       | ILMN_2060212             | -0.087              | $9.3 \times 10^{-2}$     | $9.7 \times 10^{-2}$  |
|            |     |           |              |          |          |                          | ILMN_1780197             | 0.001               | $9.8 \times 10^{-1}$     | $9.7 \times 10^{-1}$  |
| cg05425326 | 16  | 58439361  | GINS3        | 3'UTR    | 13063    | ↑↑                       | ILMN_1754272             | -0.001              | $9.8 \times 10^{-1}$     | $8.3 \times 10^{-1}$  |
| cg26435149 | 3   | 55605611  | ERC2         | 3'UTR    | 896780   | ↓↓                       | ILMN_1769195             | 0.041               | $4.3 \times 10^{-1}$     | $5.3 \times 10^{-1}$  |
| cg17393635 | 19  | 49843565  | CD37         | Body     | 4888     | ↓↓                       | ILMN_1786176             | -0.075              | $1.5 \times 10^{-1}$     | $7.4 \times 10^{-2}$  |
|            |     |           |              |          |          |                          | ILMN_2375825             | -0.058              | $2.6 \times 10^{-1}$     | $1.4 \times 10^{-1}$  |
| cg19240637 | 2   | 7172297   | RNF144A      | Body     | 114774   | ↓↓                       | ILMN_3238326             | 0.220               | $1.9 \times 10^{-5}$     | $2.4 \times 10^{-5}$  |
| cg07782285 | 19  | 13085442  | DAND5        | 3'UTR    | 5118     | ↓↓                       | ILMN_2230178             | -0.029              | $5.8 \times 10^{-1}$     | $4.9 \times 10^{-1}$  |
|            |     |           |              |          |          |                          | ILMN_2378654             | -0.109              | $3.5 \times 10^{-2}$     | $6.2 \times 10^{-2}$  |
| cg26390598 | 21  | 41032396  | B3GALT5      | 5'UTR    | 3142     | ↑↑                       | ILMN_1698756             | -0.056              | $2.8 \times 10^{-1}$     | $1.3 \times 10^{-1}$  |
|            |     |           |              |          |          |                          | ILMN_1800713             | -0.005              | $9.3 \times 10^{-1}$     | $4.8 \times 10^{-1}$  |
| cg04622454 | 9   | 140349128 | NELF         | Body     | 4658     | ↓↓                       | ILMN_1665095             | 0.112               | $3.1 \times 10^{-2}$     | $5.6 \times 10^{-2}$  |
| cg12261095 | 19  | 7764345   | FCER2        | Body     | 2687     | ↓↓                       | ILMN_1662451             | -0.133              | $1.0 \times 10^{-2}$     | $8.9 \times 10^{-3}$  |
| cg04459545 | 19  | 17375685  | USHBP1       | Promoter | 61       | ↓↓                       | ILMN_1693274             | -0.034              | $5.1 \times 10^{-1}$     | $5.6 \times 10^{-1}$  |
| cg14145338 | 9   | 139649039 | LCN8         | Body     | 3692     | ↓↓                       | ILMN_1761917             | -0.175              | $7.0 \times 10^{-4}$     | $5.3 \times 10^{-4}$  |
| cg04920032 | 12  | 50262986  | FAIM2        | 3'UTR    | 34774    | ↓↓                       | ILMN_1803855             | -0.081              | $1.2 \times 10^{-1}$     | $1.8 \times 10^{-1}$  |
| cg18413900 | 12  | 58160989  | CYP27B1      | Promoter | 13       | ↑↑                       | ILMN_1740418             | -0.003              | $9.5 \times 10^{-1}$     | $9.2 \times 10^{-1}$  |
| cg01757312 | 13  | 112720565 | SOX1         | Promoter | 1348     | ↑↑                       | ILMN_1716070             | -0.008              | $8.8 \times 10^{-1}$     | $8.4 \times 10^{-1}$  |
| cg05816193 | 6   | 26018127  | HIST1H1A     | Promoter | 87       | ↓↓                       | ILMN_1692831             | -0.098              | $5.9 \times 10^{-2}$     | $6.7 \times 10^{-2}$  |
| cg02306995 | 3   | 122635049 | SEMA5B       | Body     | 111610   | ↓↓                       | ILMN_1794370             | 0.110               | $3.5 \times 10^{-2}$     | $8.6 \times 10^{-2}$  |
|            |     |           |              |          |          |                          | ILMN_1736300             | 0.053               | $3.1 \times 10^{-1}$     | $4.1 \times 10^{-1}$  |
| cg04875062 | 1   | 17305562  | MFAP2        | 5'UTR    | 2519     | ↓↓                       | ILMN_1659565             | 0.029               | $5.8 \times 10^{-1}$     | $8.7 \times 10^{-1}$  |
|            |     |           |              |          |          |                          | ILMN_1787981             | 0.011               | $8.3 \times 10^{-1}$     | $5.3 \times 10^{-1}$  |
| cg13764516 | 9   | 139648911 | LCN8         | 3'UTR    | 3820     | ↓↓                       | ILMN_2245087             | 0.000               | $9.9 \times 10^{-1}$     | $3.9 \times 10^{-1}$  |
|            |     |           |              |          |          |                          | ILMN_1761917             | -0.142              | $6.4 \times 10^{-3}$     | $5.4 \times 10^{-3}$  |
| cg23050300 | 1   | 3281321   | PRDM16       | Body     | 295579   | ↓↓                       | ILMN_1655387             | -0.024              | $6.5 \times 10^{-1}$     | $6.1 \times 10^{-1}$  |
|            |     |           |              |          |          |                          | ILMN_1784094             | -0.022              | $6.7 \times 10^{-1}$     | $6.0 \times 10^{-1}$  |
| cg18050715 | 13  | 97996992  | MBNL2        | Body     | 69106    | ↑↑                       | ILMN_1697631             | 0.013               | $8.0 \times 10^{-1}$     | $7.4 \times 10^{-1}$  |
|            |     |           |              |          |          |                          | ILMN_2343264             | 0.008               | $8.7 \times 10^{-1}$     | $7.1 \times 10^{-1}$  |
| cg27092191 | 16  | 31884699  | ZNF267       | Promoter | 380      | ↓↓                       | ILMN_2364272             | 0.032               | $5.3 \times 10^{-1}$     | $3.2 \times 10^{-1}$  |
|            |     |           |              |          |          |                          | ILMN_1684316             | -0.022              | $6.7 \times 10^{-1}$     | $7.4 \times 10^{-1}$  |
|            |     |           |              |          |          |                          | ILMN_1658015             | -0.009              | $8.6 \times 10^{-1}$     | $9.5 \times 10^{-1}$  |
|            |     |           |              |          |          |                          | ILMN_1671010             | 0.039               | $4.5 \times 10^{-1}$     | $5.2 \times 10^{-1}$  |

We restricted to CpGs that annotated to promoter or gene region from results obtained from the meta-analysis ( $p < 1.3 \times 10^{-7}$ ) (**Table 3**). Illumina probes annotated to gene containing CpG, and results are presented for all probes for a gene. Direction of association indicated by arrows from HEALS and BEST, and downward and upward arrows correspond to inverse and positive association with CpG methylation and increasing urinary arsenic exposure. Pearson correlations were computed between methylation and expression and p-value from adjusted analysis (age and sex) is reported.

**Table S6.** Summary of cis-mQTLs results from HEALS (n=389) for CpGs identified in meta-analysis.

| CpG        | CpG Location |           | SNPs within 1 megabase window |                        | Lead cis-mQTL pair |                   |                   |                       |
|------------|--------------|-----------|-------------------------------|------------------------|--------------------|-------------------|-------------------|-----------------------|
|            | Chr          | Position  | Total Tested                  | cis-mQTLs (FDR < 0.01) | Lead SNP           | Lead SNP Position | Distance from CpG | p                     |
| cg17489312 | 1            | 9376039   | 6063                          | 103                    | rs9726646          | 9375309           | 730               | 3.4x10 <sup>-30</sup> |
| cg05962511 | 10           | 102730022 | 4658                          | 194                    | rs1570171          | 102731759         | -1737             | 3.5x10 <sup>-29</sup> |
| cg19240637 | 2            | 7172297   | 5932                          | 232                    | rs541772948        | 7166631           | 5666              | 6.2x10 <sup>-23</sup> |
| cg26435149 | 3            | 55605611  | 5494                          | 58                     | rs79875865         | 55678578          | -72967            | 3.3x10 <sup>-22</sup> |
| cg13764516 | 9            | 139648911 | 4896                          | 231                    | rs1444333281       | 139657374         | -8463             | 3.3x10 <sup>-17</sup> |
| cg01912040 | 17           | 1106553   | 5883                          | 104                    | rs4968184          | 1113656           | -7103             | 1.2x10 <sup>-14</sup> |
| cg26390598 | 21           | 41032396  | 5583                          | 21                     | rs3746887          | 41032740          | -344              | 5.7x10 <sup>-13</sup> |
| cg05428706 | 10           | 102730130 | 4658                          | 160                    | rs10509748         | 102691412         | 38718             | 9.0x10 <sup>-13</sup> |
| cg14718533 | 10           | 33355576  | 5895                          | 675                    | rs6481817          | 33299247          | 56329             | 7.0x10 <sup>-12</sup> |
| cg14145338 | 9            | 139649039 | 4895                          | 225                    | rs1444333281       | 139657374         | -8335             | 1.3x10 <sup>-11</sup> |
| cg07207669 | 1            | 155102388 | 2720                          | 269                    | rs4390169          | 155106054         | -3666             | 2.7x10 <sup>-11</sup> |
| cg09183146 | 16           | 1429863   | 7196                          | 37                     | rs149214129        | 1430914           | -1051             | 1.5x10 <sup>-10</sup> |
| cg04622454 | 9            | 140349128 | 4022                          | 29                     | rs116914963        | 140349161         | -33               | 3.9x10 <sup>-9</sup>  |
| cg10003262 | 17           | 1106589   | 5883                          | 36                     | rs78571244         | 1106909           | -320              | 1.6x10 <sup>-8</sup>  |
| cg01225779 | 5            | 179238472 | 7774                          | 188                    | rs201589495        | 179163966         | 74506             | 4.0x10 <sup>-8</sup>  |
| cg04875062 | 1            | 17305562  | 3263                          | 43                     | rs112384534        | 17297705          | 7857              | 6.8x10 <sup>-8</sup>  |
| cg07367302 | 1            | 19967428  | 5950                          | 151                    | rs3020595          | 19970727          | -3299             | 9.0x10 <sup>-8</sup>  |
| cg04459545 | 19           | 17375685  | 5479                          | 7                      | rs8112782          | 17374726          | 959               | 1.0x10 <sup>-7</sup>  |
| cg22959742 | 10           | 13913931  | 6995                          | 24                     | rs867425490        | 13739152          | 174779            | 2.6x10 <sup>-7</sup>  |
| cg18050715 | 13           | 97996992  | 4399                          | 6                      | rs9516919          | 98021849          | -24857            | 6.7x10 <sup>-7</sup>  |
| cg08596618 | 1            | 24275885  | 4461                          | 8                      | rs142675257        | 24305397          | -29512            | 5.0x10 <sup>-6</sup>  |
| cg00281776 | 2            | 209224225 | 4523                          | 8                      | rs7578859          | 208994927         | 229298            | 1.9x10 <sup>-5</sup>  |
| cg03871754 | 17           | 79320652  | 6487                          | 1                      | rs142808556        | 79391360          | -70708            | 2.6x10 <sup>-5</sup>  |
| cg13223043 | 1            | 26492308  | 4106                          | 10                     | rs10751733         | 26486880          | 5428              | 3.9x10 <sup>-5</sup>  |
| cg02306995 | 3            | 122635049 | 5827                          | 11                     | rs148907356        | 122246027         | 389022            | 4.6x10 <sup>-5</sup>  |
| cg00472758 | 16           | 2552820   | 3094                          |                        |                    |                   |                   |                       |
| cg01757312 | 13           | 112720565 | 6153                          |                        |                    |                   |                   |                       |
| cg04826368 | 6            | 27130208  | 2705                          |                        |                    |                   |                   |                       |
| cg04920032 | 12           | 50262986  | 2145                          |                        |                    |                   |                   |                       |
| cg05425326 | 16           | 58439361  | 6013                          |                        |                    |                   |                   |                       |
| cg05816193 | 6            | 26018127  | 4197                          |                        |                    |                   |                   |                       |
| cg06381803 | 19           | 46119475  | 3547                          |                        |                    |                   |                   |                       |
| cg07782285 | 19           | 13085442  | 3679                          |                        |                    |                   |                   |                       |
| cg08759026 | 11           | 69061454  | 5339                          |                        |                    |                   |                   |                       |
| cg12261095 | 19           | 7764345   | 5407                          |                        |                    |                   |                   |                       |
| cg13480898 | 19           | 10195914  | 4576                          |                        |                    |                   |                   |                       |
| cg17393635 | 19           | 49843565  | 2493                          |                        |                    |                   |                   |                       |
| cg18413900 | 12           | 58160989  | 3303                          |                        |                    |                   |                   |                       |
| cg23050300 | 1            | 3281321   | 6698                          |                        |                    |                   |                   |                       |
| cg24318728 | 17           | 39649283  | 2667                          |                        |                    |                   |                   |                       |
| cg27092191 | 16           | 31884699  | 1430                          |                        |                    |                   |                   |                       |

Analyzed all cis-mQTL pairs within a 1 megabase window around each meta-analysis arsenic-associated CpG (n=41, p < 1.3x10<sup>-7</sup>) among HEALS participants (n=389). MatrixeQTL software was used for the analysis, and model adjusted for age, sex, and first four methylation principal components (PCs). The total SNPs tested for each CpG and number of cis-mQTLs that reached FDR of 0.01 were summarized, and we reported the genomic information for the lead SNP (smallest p-value) and distance (in basepairs) from CpG.

**Table S7.** Summary of disease and trait associations with genetic variants within or near genes annotated to urinary arsenic-associated CpGs from the GWAS Catalog.

| Gene       | Variants | Associated Health Effects and Diseases                                                                                                                                                                                                      |
|------------|----------|---------------------------------------------------------------------------------------------------------------------------------------------------------------------------------------------------------------------------------------------|
| ABR        | 2        | heel bone mineral density                                                                                                                                                                                                                   |
| B3GALT5    | 0        |                                                                                                                                                                                                                                             |
| C19orf66   | 1        | blood protein levels                                                                                                                                                                                                                        |
| CD37       | 0        |                                                                                                                                                                                                                                             |
| CYP27B1    | 1        | multiple sclerosis                                                                                                                                                                                                                          |
| DAND5      | 2        | Highest math class taken and waist-hip ratio                                                                                                                                                                                                |
| EFNA1      | 3        | hair color, 1,5-anhydroglucitol levels, urinary albumin excretion                                                                                                                                                                           |
| EML2       | 1        | Type 2 diabetes                                                                                                                                                                                                                             |
| ERC2       | 16       | heel bone mineral density, lobe attachment, lung function (FVC, FEV1/FVC), educational attainment, highest math class taken, self-reported math ability, adolescent idiopathic scoliosis, cognitive performance, smoking initiation         |
| FAIM2      | 2        | BMI (adult and childhood), extreme obesity, fat free mass                                                                                                                                                                                   |
| FAM110D    | 2        | heel bone mineral density, white blood cell count                                                                                                                                                                                           |
| FCER2      | 8        | blood protein levels, cerebrospinal fluid biomarker levels                                                                                                                                                                                  |
| FRMD4A     | 9        | red blood cell distribution width, adolescent idiopathic scoliosis, lung function (FEV1/FVC), red blood cell count, Alzheimer's disease, monoclonal gammopathy                                                                              |
| GBAP1      | 5        | gastric cancer, blood urea nitrogen levels, creatinine levels, renal function-related traits (BUN), glomerular filtration rate                                                                                                              |
| GIN3       | 0        |                                                                                                                                                                                                                                             |
| HIST1H1A   | 0        |                                                                                                                                                                                                                                             |
| HIST1H2AH  | 0        |                                                                                                                                                                                                                                             |
| ITGB1      | 0        |                                                                                                                                                                                                                                             |
| KRT36      | 0        |                                                                                                                                                                                                                                             |
| LCN8       | 0        |                                                                                                                                                                                                                                             |
| MAPRE2     | 1        | adolescent idiopathic scoliosis                                                                                                                                                                                                             |
| MBNL2      | 7        | Diastolic blood pressure, self-reported math ability, highest math class taken, neuroticism, cognitive performance, menarche (age at onset)                                                                                                 |
| MFAP2      | 4        | height, lung function (FVC, FEV1/FVC), body fat distribution, pulmonary function, blood protein levels                                                                                                                                      |
| MINOS-NBL1 | 0        |                                                                                                                                                                                                                                             |
| MYEOV      | 17       | prostate cancer, systolic blood pressure, macular thickness, balding type 1, waist-hip ratio, male-pattern baldness, pulse pressure, hair color, diastolic blood pressure, breast size, intracranial aneurysm, cancer (pleiotropy)          |
| NBR1       | 0        |                                                                                                                                                                                                                                             |
| NSMF       | 0        |                                                                                                                                                                                                                                             |
| NELF       | 0        |                                                                                                                                                                                                                                             |
| PRDM16     | 14       | migraine, red blood cell count, hematocrit, mean corpuscular hemoglobin, plateletcrit, mean platelet volume, platelet distribution width, Eczema, QRS duration, systolic blood pressure, coronary artery disease, headache, motion sickness |
| PTH2R      | 2        | menarche (age at onset), adolescent idiopathic scoliosis                                                                                                                                                                                    |
| RNF144A    | 1        | intracranial aneurysm                                                                                                                                                                                                                       |
| SEMA4G     | 0        |                                                                                                                                                                                                                                             |
| SEMA5B     | 1        | age-related diseases and mortality                                                                                                                                                                                                          |
| SOX1       | 0        |                                                                                                                                                                                                                                             |
| SPSB1      | 9        | waist-hip ratio, pulse pressure, eosinophil counts, systolic blood pressure, lung function (FVC), Eczema, neutrophil percentage of granulocytes, eosinophil percentage of granulocytes, sum eosinophil basophil counts                      |
| SQSTM1     | 0        |                                                                                                                                                                                                                                             |
| SRSF10     | 1        | red cell distribution width                                                                                                                                                                                                                 |
| TBC1D24    | 0        |                                                                                                                                                                                                                                             |
| TMEM105    | 0        |                                                                                                                                                                                                                                             |
| UNKL       | 0        |                                                                                                                                                                                                                                             |
| USHBP1     | 2        | high-grade serous ovarian cancer, serous invasive ovarian cancer, breast cancer, epithelial ovarian cancer, invasive epithelial ovarian cancer, breast cancer in BRCA1 mutation carriers, breast cancer (ER-negative), cancer (pleiotropy)  |
| ZNF267     | 0        |                                                                                                                                                                                                                                             |

We extracted gene annotations from arsenic-associated CpGs identified in HEALS discovery analysis ( $p < 6.5 \times 10^{-8}$ ,  $n=6$ ) and meta-analysis ( $p < 1.3 \times 10^{-7}$ ,  $n=38$ ). Genes were queried in the GWAS Catalog (accessed 4/22/2019), and we summarized unique SNP count among SNPs with  $p < 10^{-8}$ . Disease and health traits associated with the SNPs were reported.

## REFERENCES

- Ameer SS, Engstrom K, Hossain MB, Concha G, Vahter M, Broberg K. 2017. Arsenic exposure from drinking water is associated with decreased gene expression and increased dna methylation in peripheral blood. *Toxicol Appl Pharmacol* 321:57-66.
- Argos M, Chen L, Jasmine F, Tong L, Pierce BL, Roy S, et al. 2015. Gene-specific differential dna methylation and chronic arsenic exposure in an epigenome-wide association study of adults in bangladesh. *Environ Health Perspect* 123:64-71.
- Houseman EA, Accomando WP, Koestler DC, Christensen BC, Marsit CJ, Nelson HH, et al. 2012. Dna methylation arrays as surrogate measures of cell mixture distribution. *BMC Bioinformatics* 13:86.
- Kaushal A, Zhang H, Karmaus WJJ, Everson TM, Marsit CJ, Karagas MR, et al. 2017. Genome-wide dna methylation at birth in relation to in utero arsenic exposure and the associated health in later life. *Environ Health* 16:50.
- Kile ML, Houseman EA, Baccarelli AA, Quamruzzaman Q, Rahman M, Mostofa G, et al. 2014. Effect of prenatal arsenic exposure on dna methylation and leukocyte subpopulations in cord blood. *Epigenetics* 9:774-782.
- Leek JT, Johnson WE, Parker HS, Jaffe AE, Storey JD. 2012. The sva package for removing batch effects and other unwanted variation in high-throughput experiments. *Bioinformatics* 28:882-883.
- Peters TJ, Buckley MJ, Statham AL, Pidsley R, Samaras K, R VL, et al. 2015. De novo identification of differentially methylated regions in the human genome. *Epigenetics Chromatin* 8:6.
- Rojas D, Rager JE, Smeester L, Bailey KA, Drobna Z, Rubio-Andrade M, et al. 2015. Prenatal arsenic exposure and the epigenome: Identifying sites of 5-methylcytosine alterations that predict functional changes in gene expression in newborn cord blood and subsequent birth outcomes. *Toxicol Sci* 143:97-106.
