# Supplementary material
Source: PubMed Central journal article supplement (PMC6791539)
Supplement: ehp-127-057011-s003.pdf [file ehp-127-057011-s003.pdf]

**Note to readers with disabilities:** *EHP* strives to ensure that all journal content is accessible to all readers. However, some figures and Supplemental Material published in *EHP* articles may not conform to [508 standards](#) due to the complexity of the information being presented. If you need assistance accessing journal content, please contact [ehp508@niehs.nih.gov](mailto:ehp508@niehs.nih.gov). Our staff will work with you to assess and meet your accessibility needs within 3 working days.

### **Supplemental Material**

#### **Association of Arsenic Exposure with Whole Blood DNA Methylation: An Epigenome-Wide Study of Bangladeshi Adults**

Kathryn Demanelis, Maria Argos, Lin Tong, Justin Shinkle, Mekala Sabarinathan, Muhammad Rakibuz-Zaman, Golam Sarwar, Hasan Shahriar, Tariqul Islam, Mahfuzar Rahman, Mohammad Yunus, Joseph H. Graziano, Karin Broberg, Karin Engström, Farzana Jasmine, Habibul Ahsan, and Brandon L. Pierce

#### **Table of Contents**

**Figure S1.** QQ-plot of epigenome-wide analysis results of log<sub>2</sub>-transformed urinary arsenic concentration (creatinine-adjusted) in HEALS (n=396).

**Figure S2.** Urinary arsenic concentration (creatinine-adjusted) and DNA methylation at arsenic-associated CpGs (FDR < 0.05) in HEALS and reported Pearson correlations.

**Figure S3.** Relationship between water and urinary arsenic measurements in HEALS (n=396).

**Figure S4.** QQ-plot of the observed p-values from epigenome-wide analysis of log<sub>2</sub>-transformed water arsenic concentration in HEALS (n=396).

**Figure S5.** Genome-wide associations between log<sub>2</sub>-transformed water arsenic concentration and CpG site-specific methylation in HEALS (n=396).

**Figure S6.** QQ-plot of epigenome-wide analysis results for log<sub>2</sub>-transformed urinary arsenic concentration (creatinine-adjusted) in BEST (n=400).

**Figure S7.** Genome-wide associations between log<sub>2</sub>-transformed urinary arsenic concentration (creatinine-adjusted) and CpG site-specific methylation in BEST (n=400).

**Figure S8.** Enrichment of urinary arsenic-associated CpGs identified in meta-analysis of HEALS (n=396) and BEST (n=400) within genomic features stratified by direction of association (FDR < 0.05).

**Table S1.** Results from different epigenome-wide analysis methods and exposure modeling in HEALS (n=396).

**Table S2.** Association between estimated cell type proportions and log<sub>2</sub>-transformed urinary arsenic concentration (creatinine-adjusted) in HEALS (n=396).

**Table S3.** Regions of methylation associated with log<sub>2</sub>-transformed urinary arsenic concentration in HEALS (minimum FDR < 10<sup>-4</sup>).

**Table S4.** Results from gene set enrichment analysis based on KEGG pathways for genes annotating to urinary arsenic-associated CpGs from HEALS discovery analysis and meta-analysis of HEALS and BEST.

**Table S5.** CpGs associated with log<sub>2</sub>-transformed urinary arsenic from meta-analysis ( $p < 1.3 \times 10^{-7}$ ) and their relationship with gene expression in BEST (n=371).

**Table S6.** Summary of cis-mQTLs results from HEALS (n=389) for CpGs identified in meta-analysis.

**Table S7.** Summary of disease and trait associations with genetic variants within or near genes annotated to urinary arsenic-associated CpGs from the GWAS Catalog.

**Additional File-** Excel Document

**References**
